# Supplementary material for: Steroids from Marine-Derived Fungi: Evaluation of Antiproliferative and Antimicrobial Activities of Eburicol
Source: PubMed Central journal article supplement (PMC6628047; doi:10.3390/md17060372), 2019-06-21
Supplement: marinedrugs-17-00372-s001.pdf [file marinedrugs-17-00372-s001.pdf]

## **Supplementary Materials**

### **Steroids from Marine-Derived Fungi: Evaluation of Antiproliferative and Antimicrobial Activities of Eburicol**

Ana Camila dos Santos Dias, Aurélie Couzinet-Mossion, Nicolas Ruiz, Fatima Lakhdar, Samira Etahiri, Samuel Bertrand, Lucie Ory, Christos Roussakis, Yves-François Pouchus, Hassan Nazih, Gaetane Wielgosz-Collin

## Table of Contents

**Figure S1.**  $^1\text{H}$  NMR spectrum of Eburicol in  $\text{CDCl}_3$  (400 MHz, 25°C)

**Figure S2.** COSY spectrum of Eburicol in  $\text{CDCl}_3$  (400 MHz, 25°C)

**Figure S3.** Expanded HSQC spectrum of eburicol in  $\text{CDCl}_3$  (400 MHz for  $^1\text{H}$ , 25°C)

**Figure S4.** Expanded HSQC spectrum of eburicol in  $\text{CDCl}_3$  (400 MHz for  $^1\text{H}$ , 25°C)

**Figure S5.** Expanded HMBC spectrum of eburicol in  $\text{CDCl}_3$  (400 MHz for  $^1\text{H}$ , 25°C)

**Figure S6.** Expanded HMBC spectrum of eburicol in  $\text{CDCl}_3$  (400 MHz for  $^1\text{H}$ , 25°C)

**Table S1.** Evaluation of antimicrobial activity of eburicol against human pathogenic bacteria (n = 3). Values should be compared to the standard **Streptomycin** results ( **$12 \pm 2$  at 50  $\mu\text{g/mL}$**  and  **$15 \pm 2$  at 100  $\mu\text{g/mL}$**  for all strains).

Figure S1.  $^1\text{H}$  NMR spectrum of Eburicol in  $\text{CDCl}_3$  (400 MHz,  $25^\circ\text{C}$ )

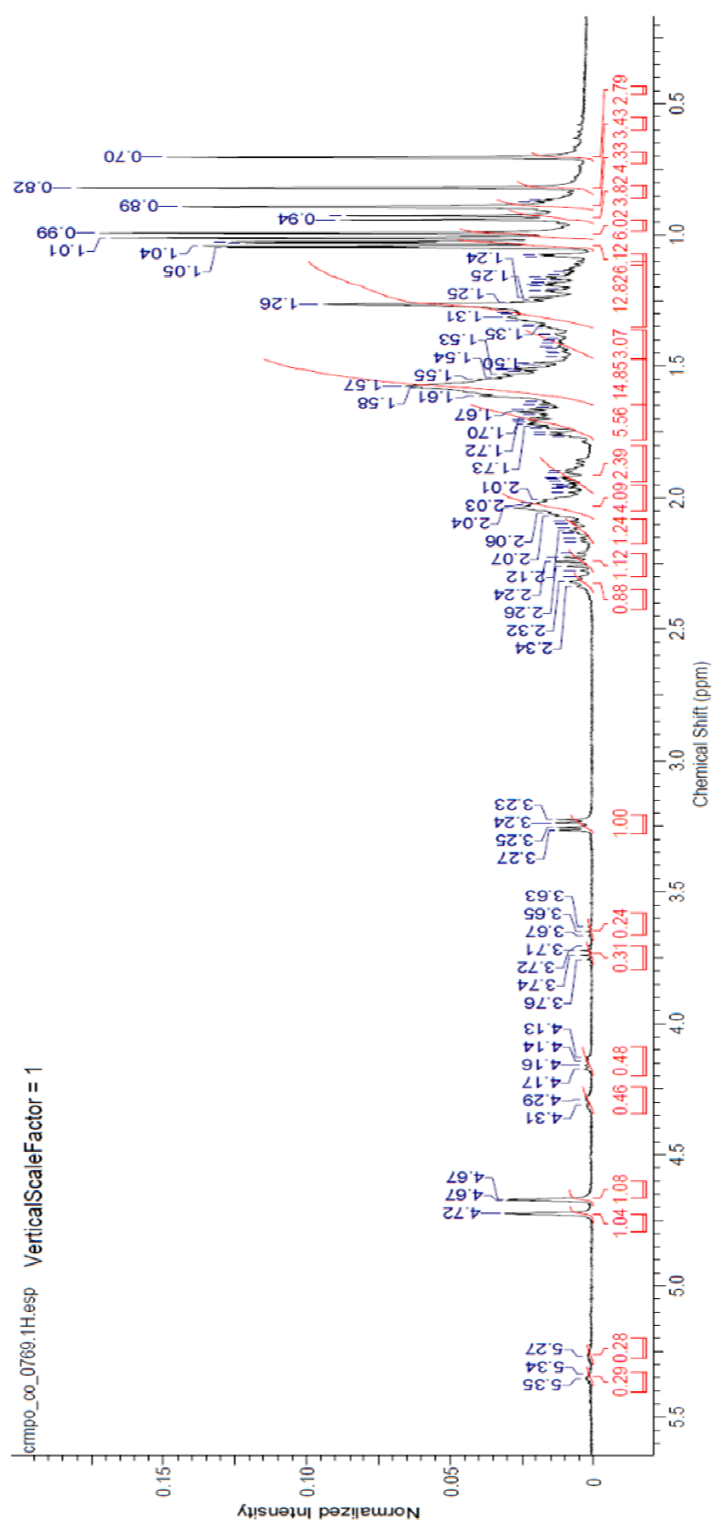

**Figure S2.** COSY spectrum of Eburicol in CDCl<sub>3</sub> (400 MHz, 25°C)

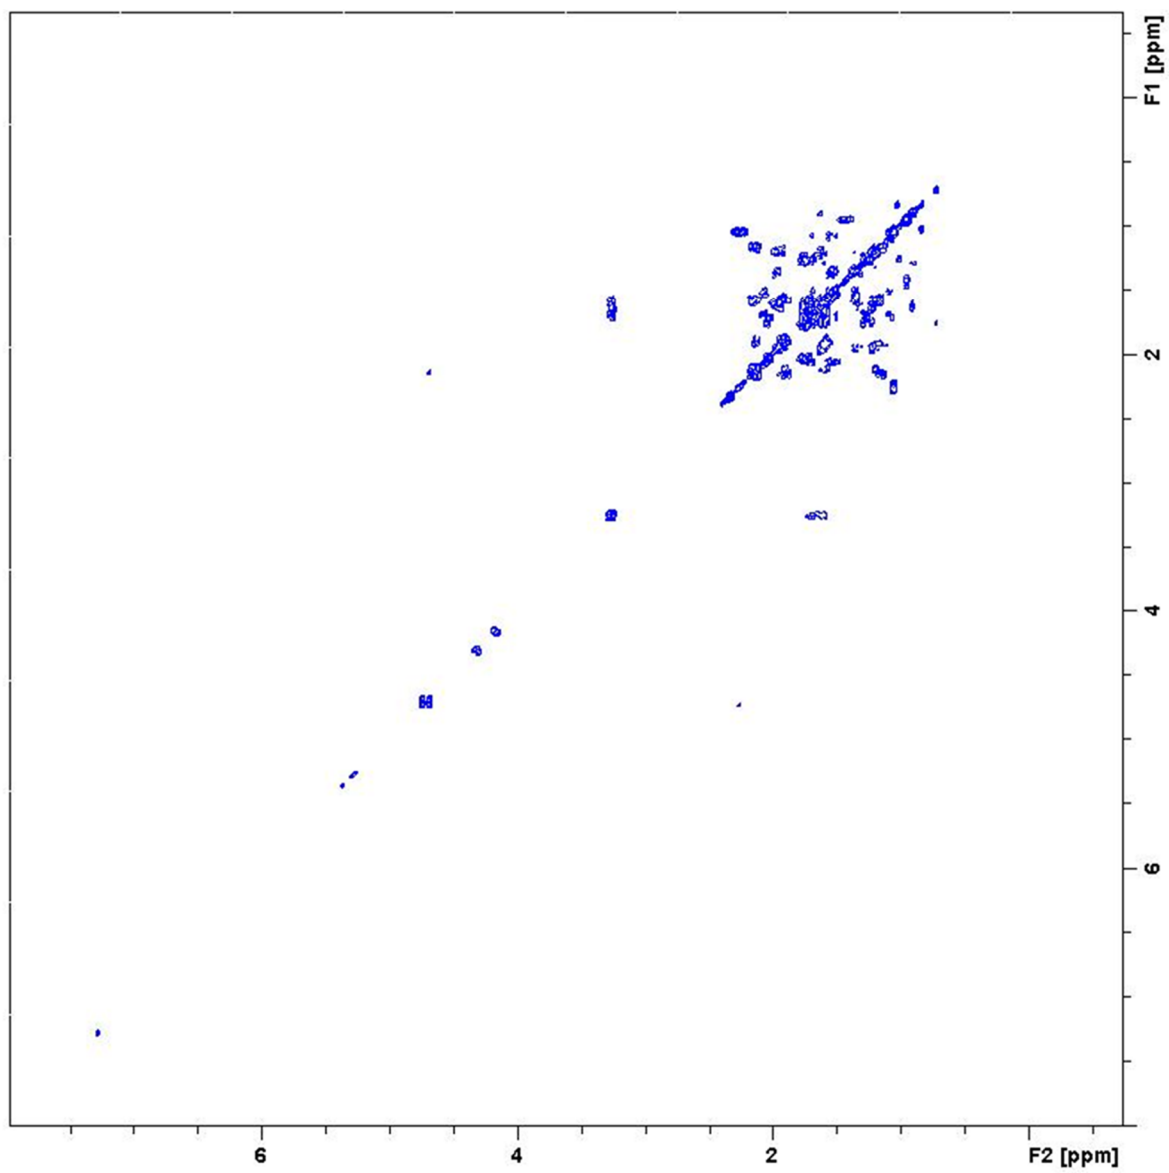



Figure S3. Expanded HSQC spectrum of eburicol in CDCl<sub>3</sub> (400 MHz for <sup>1</sup>H, 25°C)

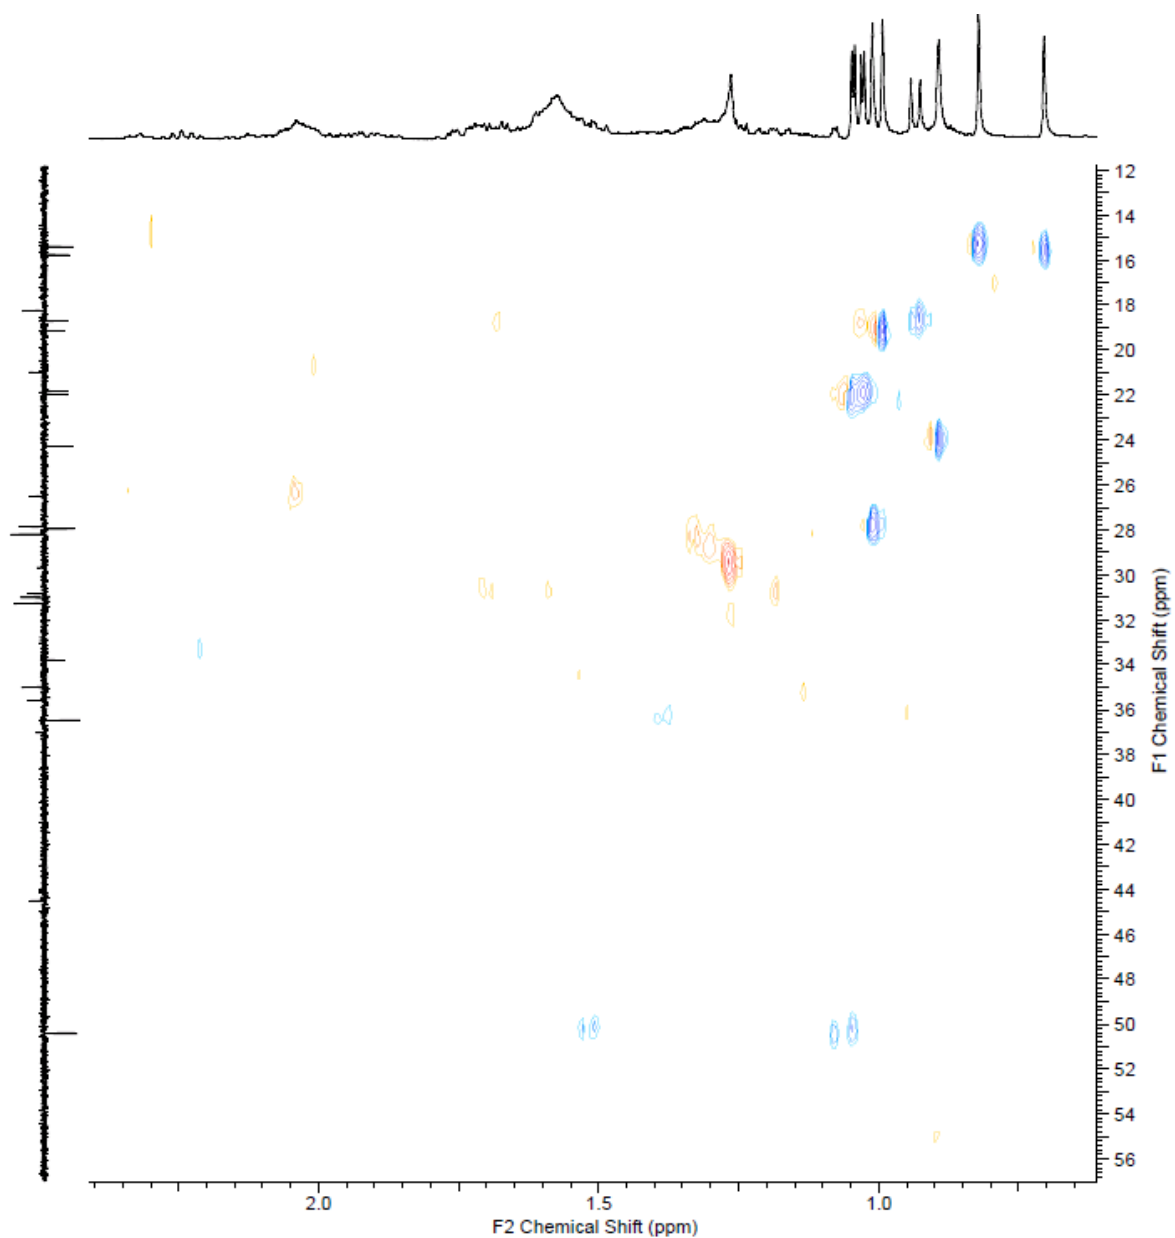

**Figure S4.** Expanded HSQC spectrum of eburicol in CDCl<sub>3</sub> (400 MHz for <sup>1</sup>H, 25°C)

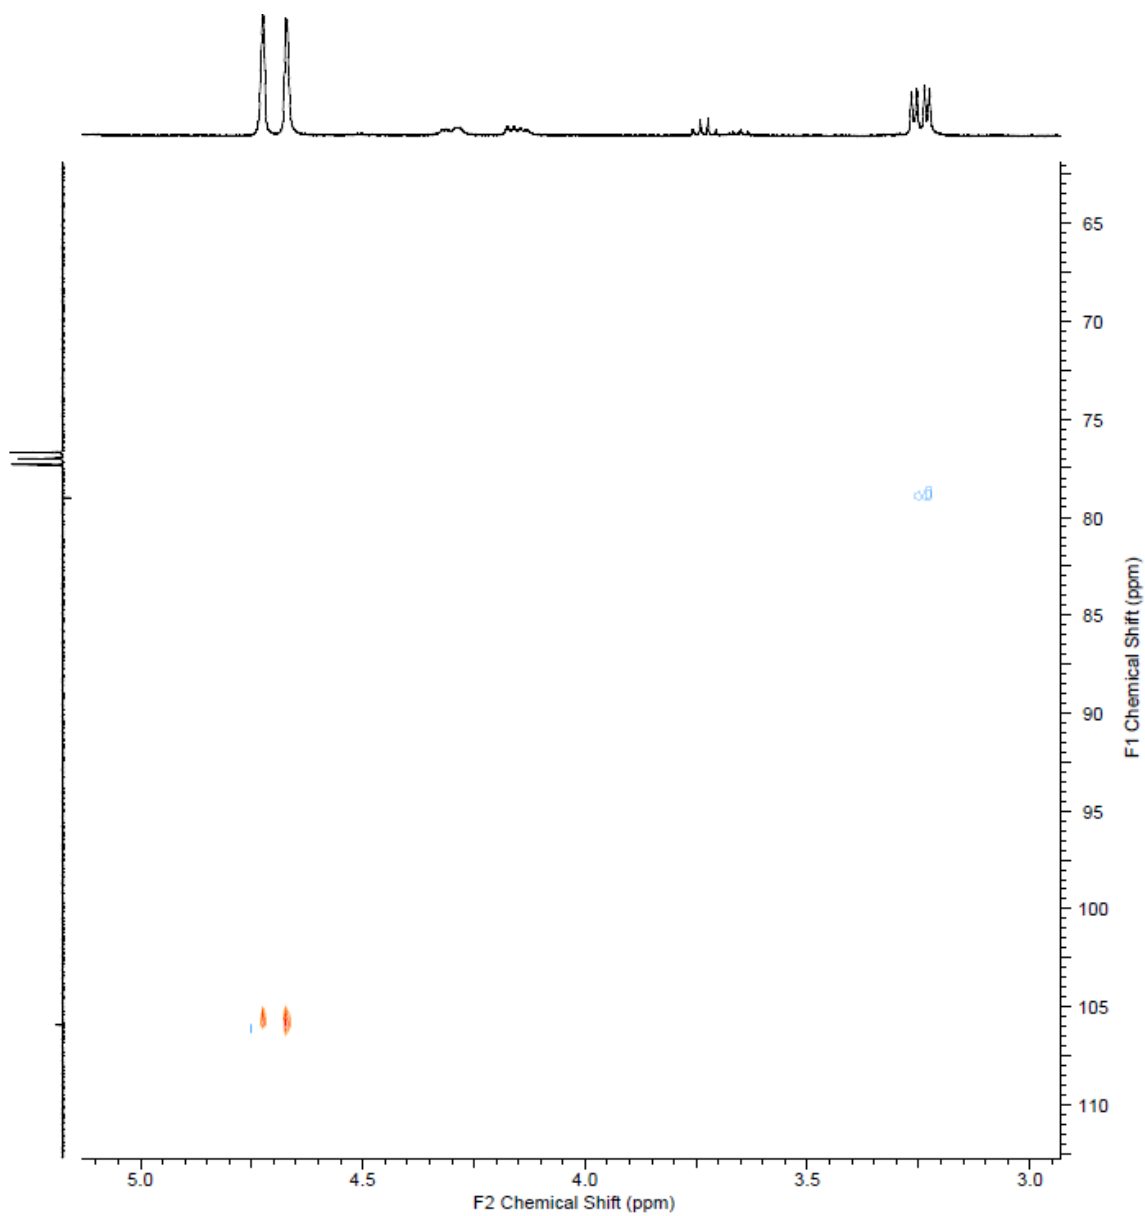

Figure S5. Expanded HMBC spectrum of eburicol in CDCl<sub>3</sub> (400 MHz for <sup>1</sup>H, 25°C)

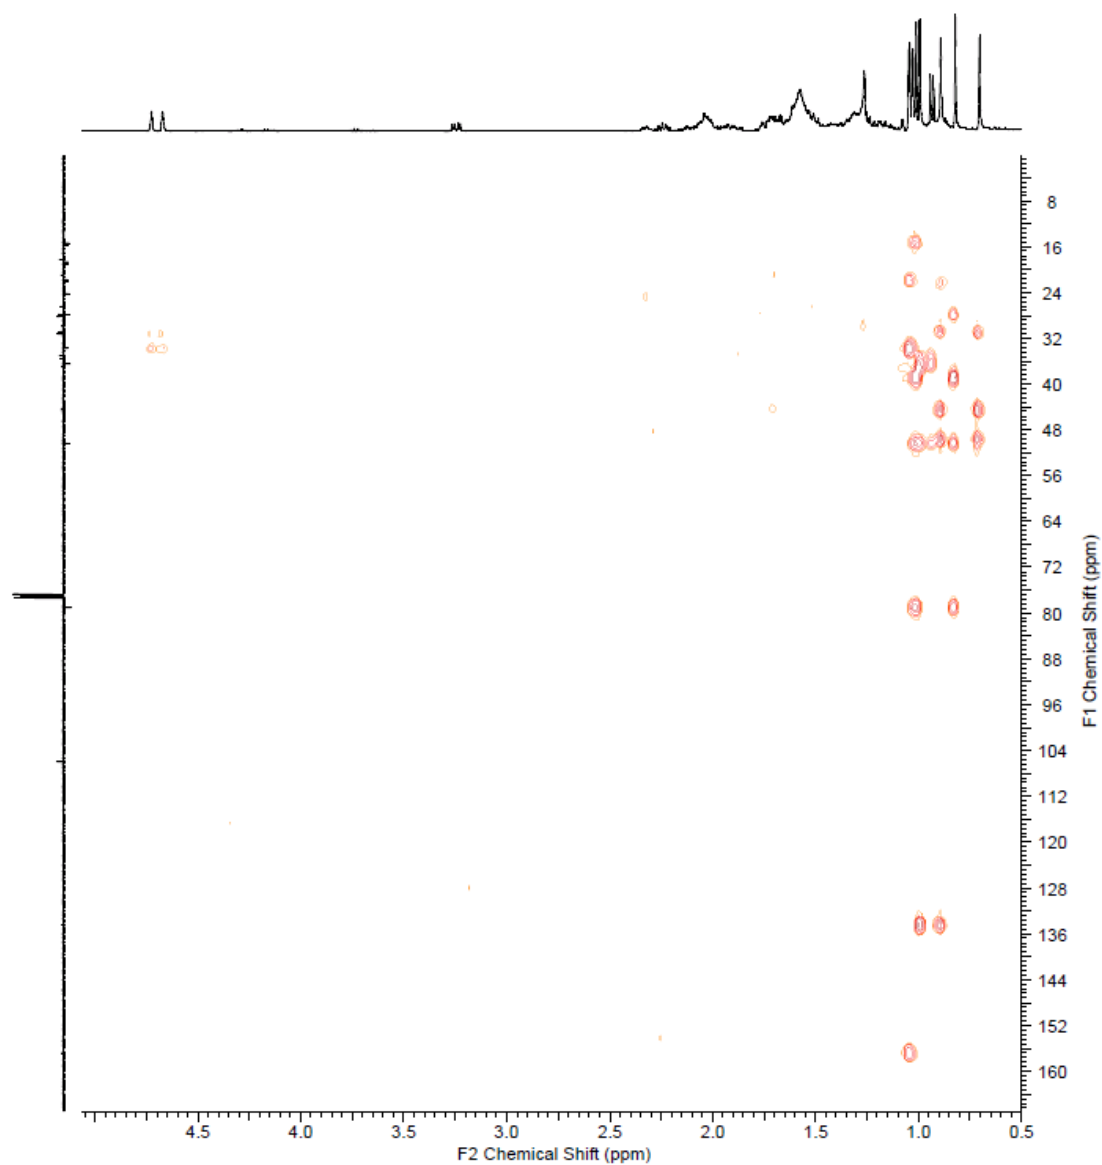

Figure S6. Expanded HMBC spectrum of eburicol in CDCl<sub>3</sub> (400 MHz for <sup>1</sup>H, 25°C)

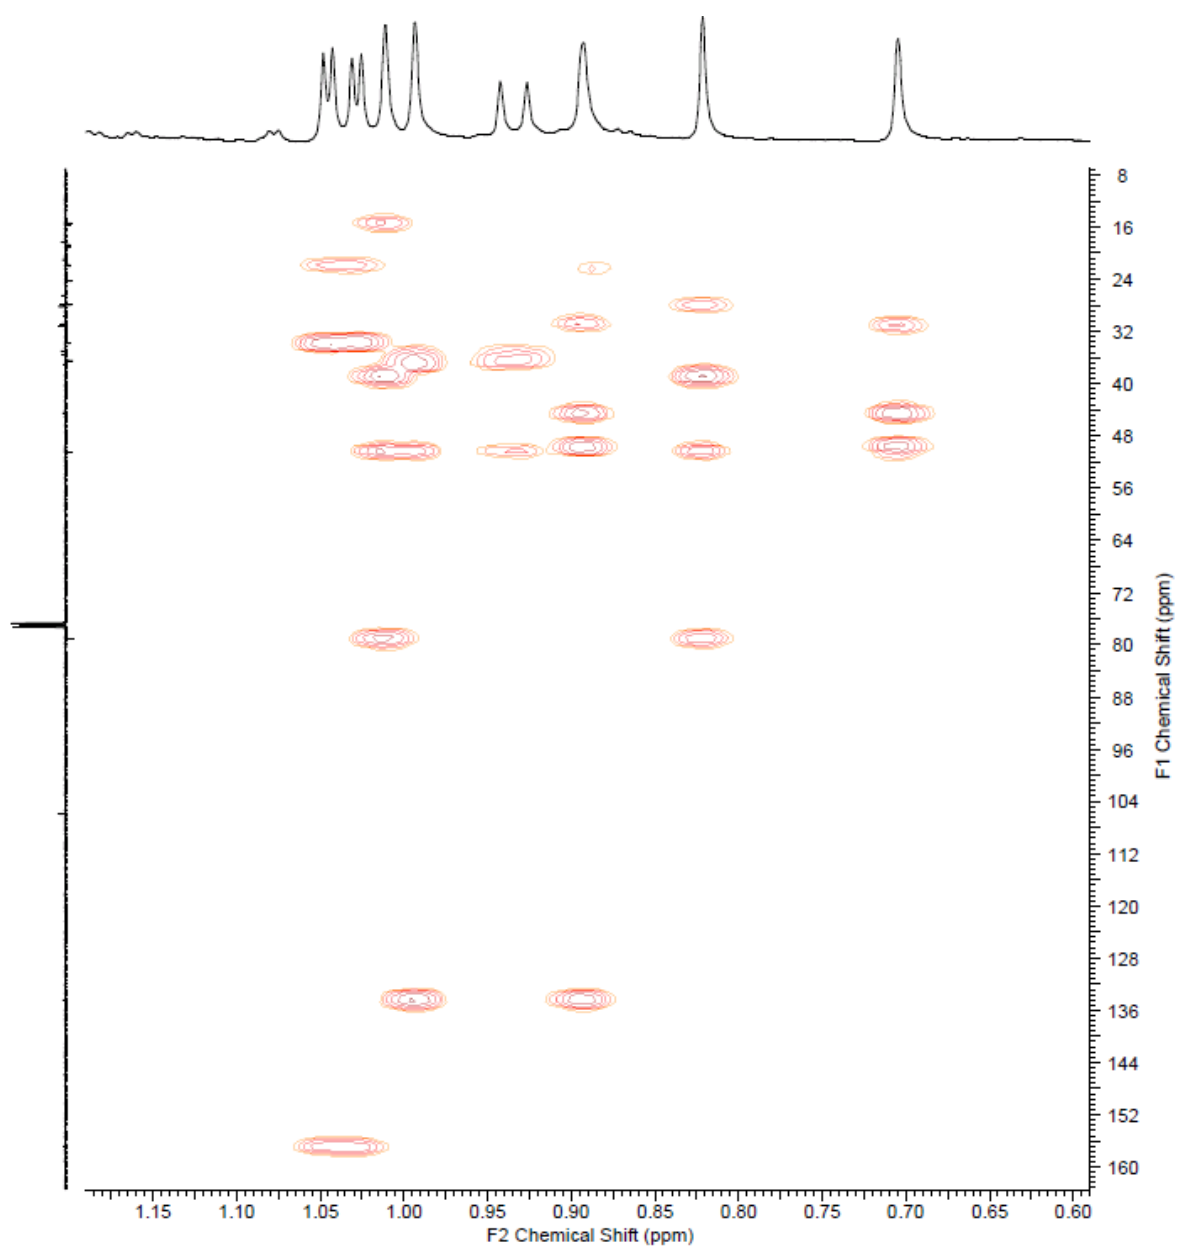

**Table S1.** Evaluation of antimicrobial activity of eburicol against human pathogenic bacteria (n = 3). Values should be compared to the standard **Streptomycin** results ( $12 \pm 2$  at  $50 \mu\text{g/mL}$  and  $15 \pm 2$  at  $100 \mu\text{g/mL}$  for all strains).

| Strains                | Inhibition zone (mm) <sup>(1)</sup><br>after treatment with<br>eburicol |                      |
|------------------------|-------------------------------------------------------------------------|----------------------|
|                        | 50 $\mu\text{g/mL}$                                                     | 100 $\mu\text{g/mL}$ |
| <i>B. cereus</i>       | 10 $\pm$ 1                                                              | 11 $\pm$ 1           |
| <i>Bacillus</i> sp.    | 8 $\pm$ 0                                                               | 12 $\pm$ 1           |
| <i>L. ivanovii</i>     | 10 $\pm$ 1                                                              | 9 $\pm$ 1            |
| <i>S. aureus</i>       | 7 $\pm$ 0                                                               | 24 $\pm$ 4           |
| <i>C. freundii</i>     | 8 $\pm$ 1                                                               | 11 $\pm$ 2           |
| <i>E. coli</i>         | 10 $\pm$ 1                                                              | ND                   |
| <i>Salmonella</i> spp. | 9 $\pm$ 1                                                               | 8 $\pm$ 2            |

(1):  $\emptyset \leq 8\text{mm}$ : no significant antimicrobial activity;  $8 < \emptyset \leq 12\text{ mm}$ : weak antimicrobial activity;  $12 < \emptyset \leq 14\text{ mm}$ : significant antimicrobial activity;  $\emptyset > 14\text{ mm}$ : high antimicrobial activity. ND: not determined
